# Supplementary material for: RSK2 Maintains Adult Estrogen Homeostasis by Inhibiting ERK1/2-Mediated Degradation of Estrogen Receptor Alpha
Source: PubMed Central journal article supplement — Cell Rep. Author manuscript; Available in PMC 2020 Sep 2. (PMC7465694; doi:10.1016/j.celrep.2020.107931), 2020-07-21
Supplement: NIHMS1613945-supplement-1.pdf [file NIHMS1613945-supplement-1.pdf]

**Cell Reports, Volume 32**

**Supplemental Information**

**RSK2 Maintains Adult Estrogen Homeostasis  
by Inhibiting ERK1/2-Mediated Degradation  
of Estrogen Receptor Alpha**

**Katarzyna A. Ludwik, Zachary M. Sandusky, Kimberly M. Stauffer, Yu Li, Kelli L. Boyd, George A. O'Doherty, Thomas P. Stricker, and Deborah A. Lannigan**

## Supplemental Information

Ludwik&Sandusky\_Supp\_Figure\_1

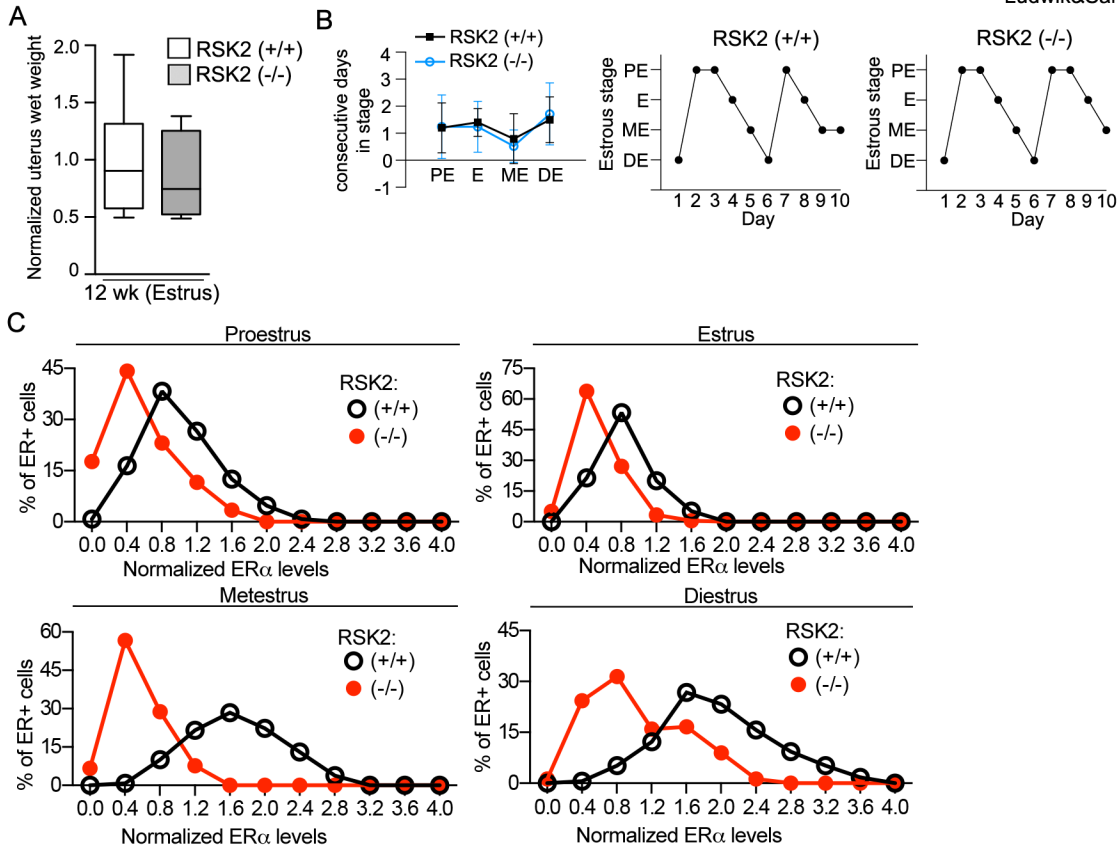

**Figure 1 Estrogen responsiveness in WT and RSK2-KO mice.**

(A) Uterine wet weight is similar in WT and RSK2-KO. (median  $\pm$  quartile,  $n \geq 8$  mice/genotype, Student's t-test).

(B) Cycling through the estrous cycle is similar in WT and RSK2-KO mice. Left graph: (mean  $\pm$  S.D.,  $n \geq 10$  mice/genotype); Right graph: Representative cycle.

(C) ER $\alpha$  protein expression levels are reduced in RSK2-KO at all stages of the estrous cycle in adult mammary glands. The graphs were generated from data shown in Figs. 1B and 1C.

Related to Figures 1, 2 and 5

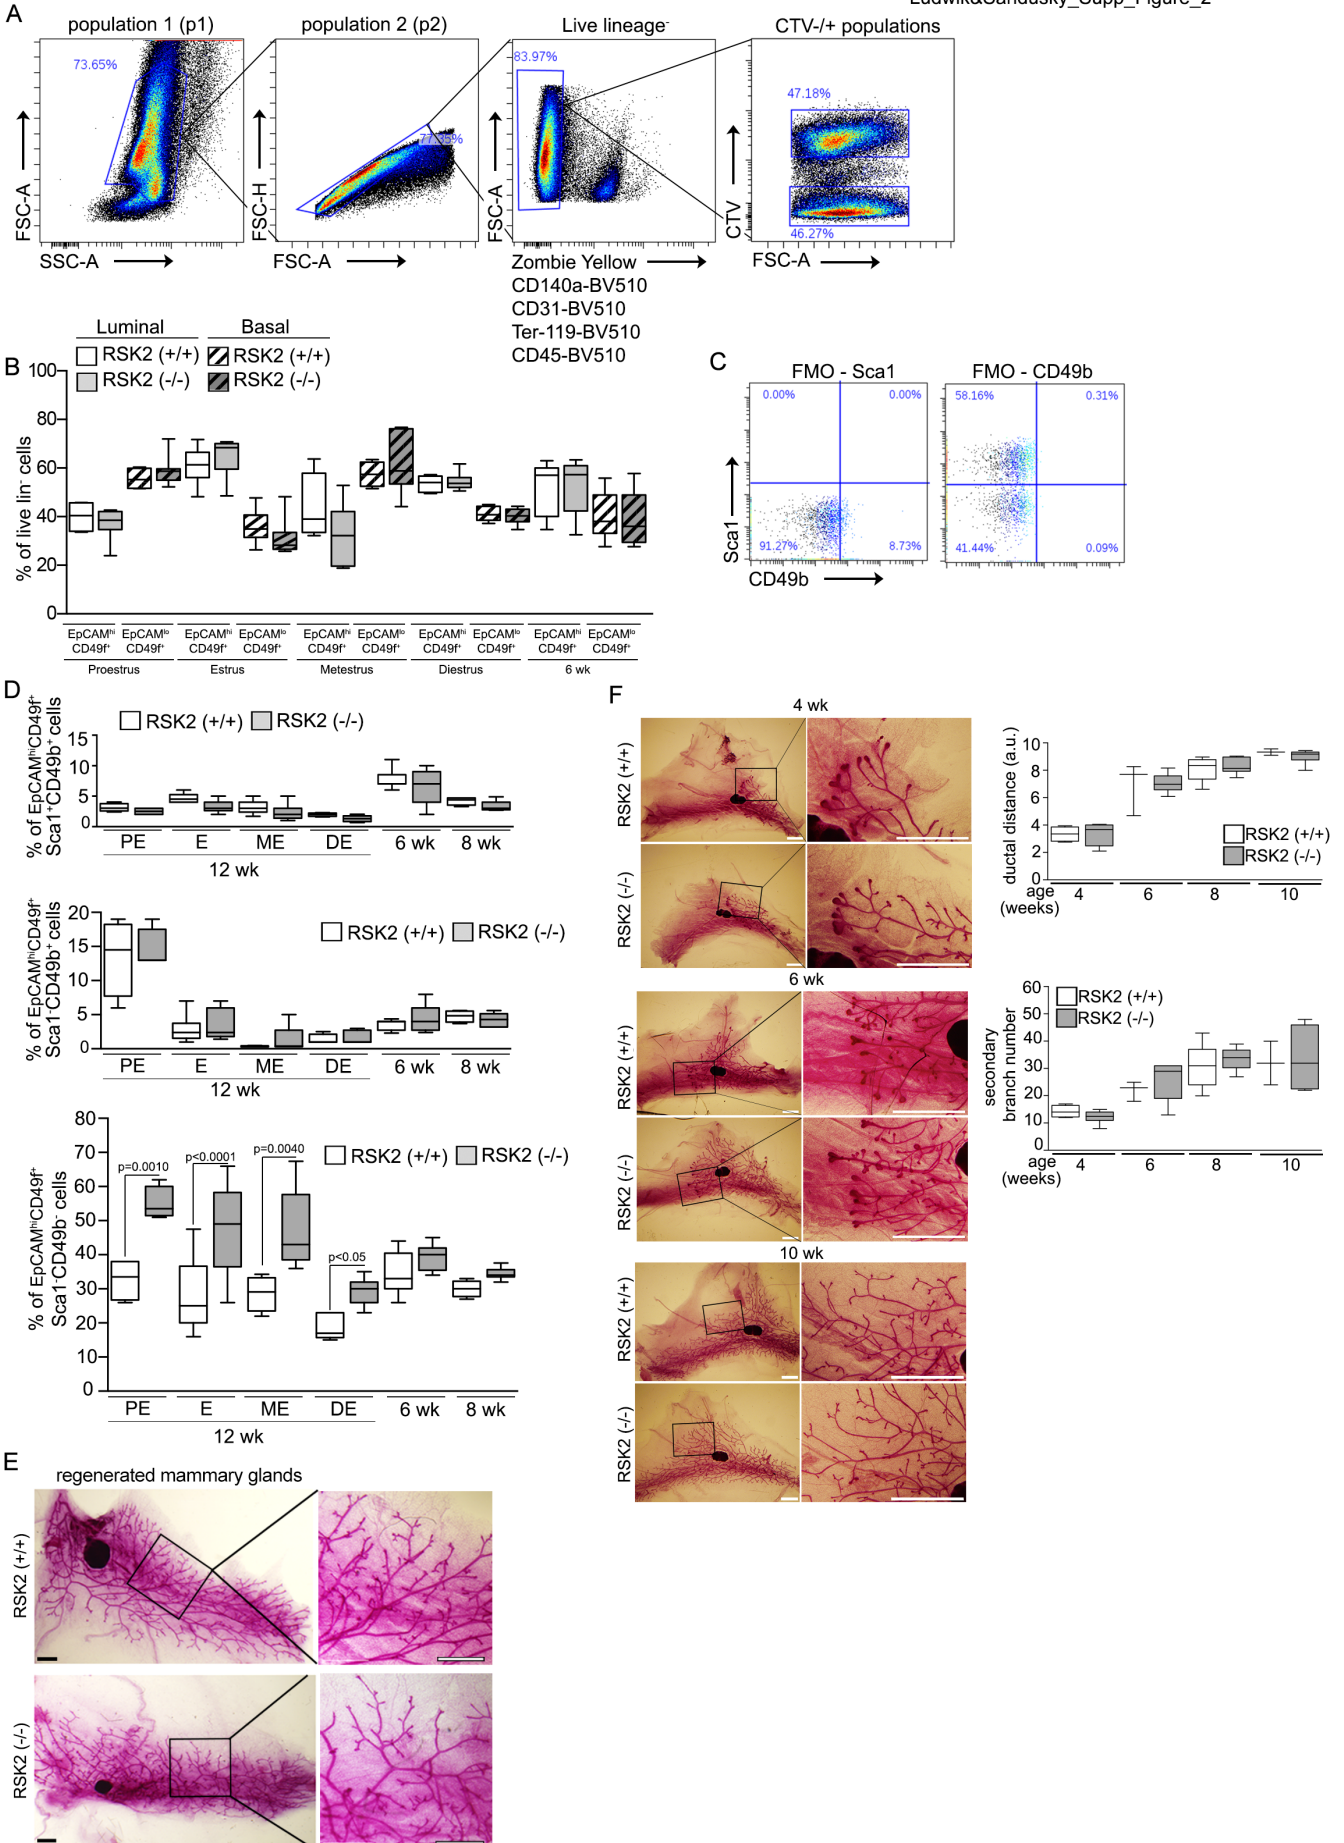

## Figure 2 Analysis of WT and RSK2-KO mammary glands.

(A) Gating strategy for flow cytometry analysis and sorting of mouse mammary epithelium. Cells were gated for forward (FCS-A) and side (SSC-A) scatter to remove debris. Single cells (p2) gated by FSC-H/A were then gated for live cells (ZombieYellow negative). Lineage<sup>+</sup> (Cd140a<sup>+</sup>; CD31<sup>+</sup>; Ter-119<sup>+</sup>; and CD45<sup>+</sup>) cells were gated out. CellTraceViolet (CTV) positive and negative populations were separated.

(B) FACS analysis of luminal and basal epithelial populations in the mammary gland (median  $\pm$  quartile,  $n \geq 4$  mice/genotype and stage, one-way ANOVA with Holm-Sidak's correction for multiple comparisons) (Table S1). solid=luminal, hatched = basal

(C) Fluorescence minus one strategy for determining the gates for Sca1 and CD49b.

(D) FACS analysis of luminal progenitor and undefined epithelial populations (median  $\pm$  quartile,  $n \geq 3$  mice/genotype and stage, one-way ANOVA with Holm-Sidak's correction for multiple comparisons) (Table S1).

(E) Representative whole mount image of the regenerated 4<sup>th</sup> mammary gland from WT or RSK2-KO ~ 20 wk after transplantation at 3 wk. Scale bar = 1 mm.

(F) Mammary gland development is similar in WT and RSK2-KO. (median  $\pm$  quartile,  $n \geq 2$  mice/genotype, one-way ANOVA with Holm-Sidak's correction for multiple comparisons) (Table S1). Scale bar = 2 mm.

Related to Figure 1 and 2

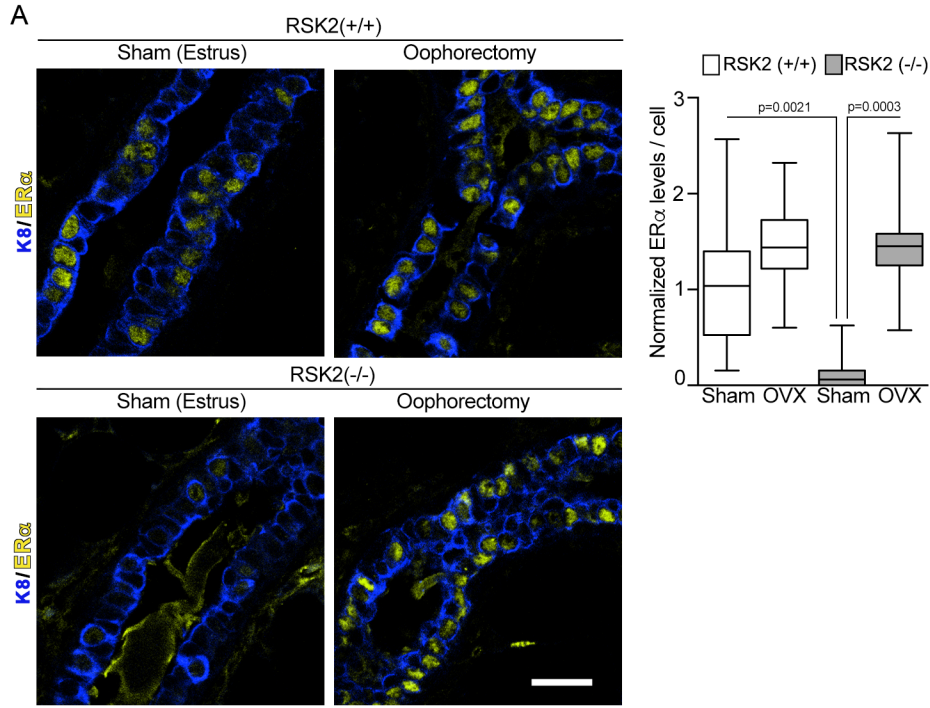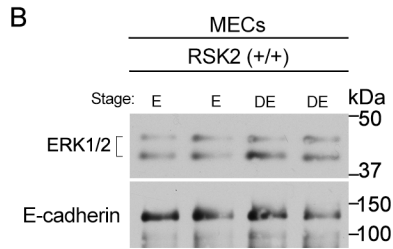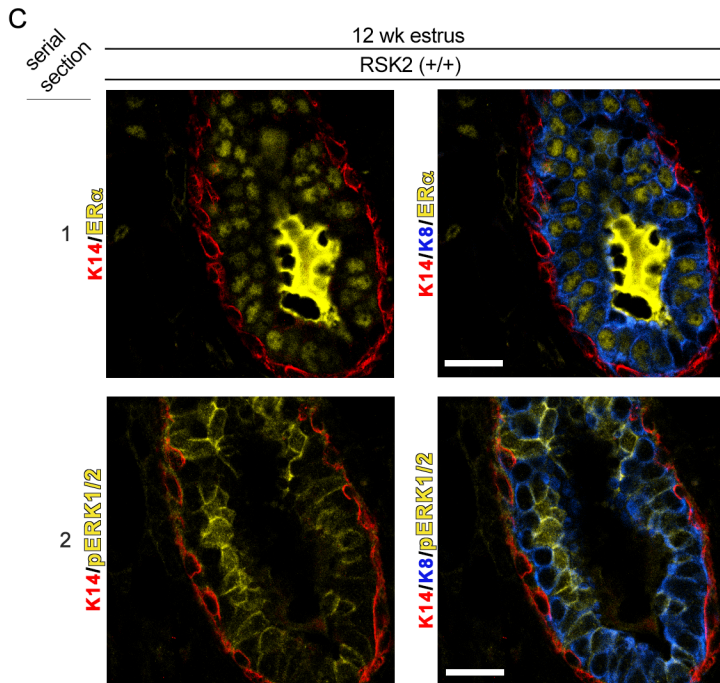

**Figure 3 ERK1/2 is active in ER+ cells.**

(A) ER $\alpha$  protein levels increase in response to oophorectomy (median  $\pm$  quartile,  $n \geq 2$  mice/genotype and procedure,  $\geq 3$  fields/mouse, one-way ANOVA with Holm-Sidak's correction for multiple comparisons) (Table S1). Scale bar= 20  $\mu\text{m}$ .

(B) ERK1/2 protein levels are similar in estrus and diestrus in mammary epithelial cells isolated from WT adult mammary glands.

(C) The image on the left is shown without K8 to facilitate the visualization of ER $\alpha$  and pERK1/2. Serial sections were necessary to avoid antibody interference. Scale bar = 20  $\mu\text{m}$ .

Related to Figures 3 and 6

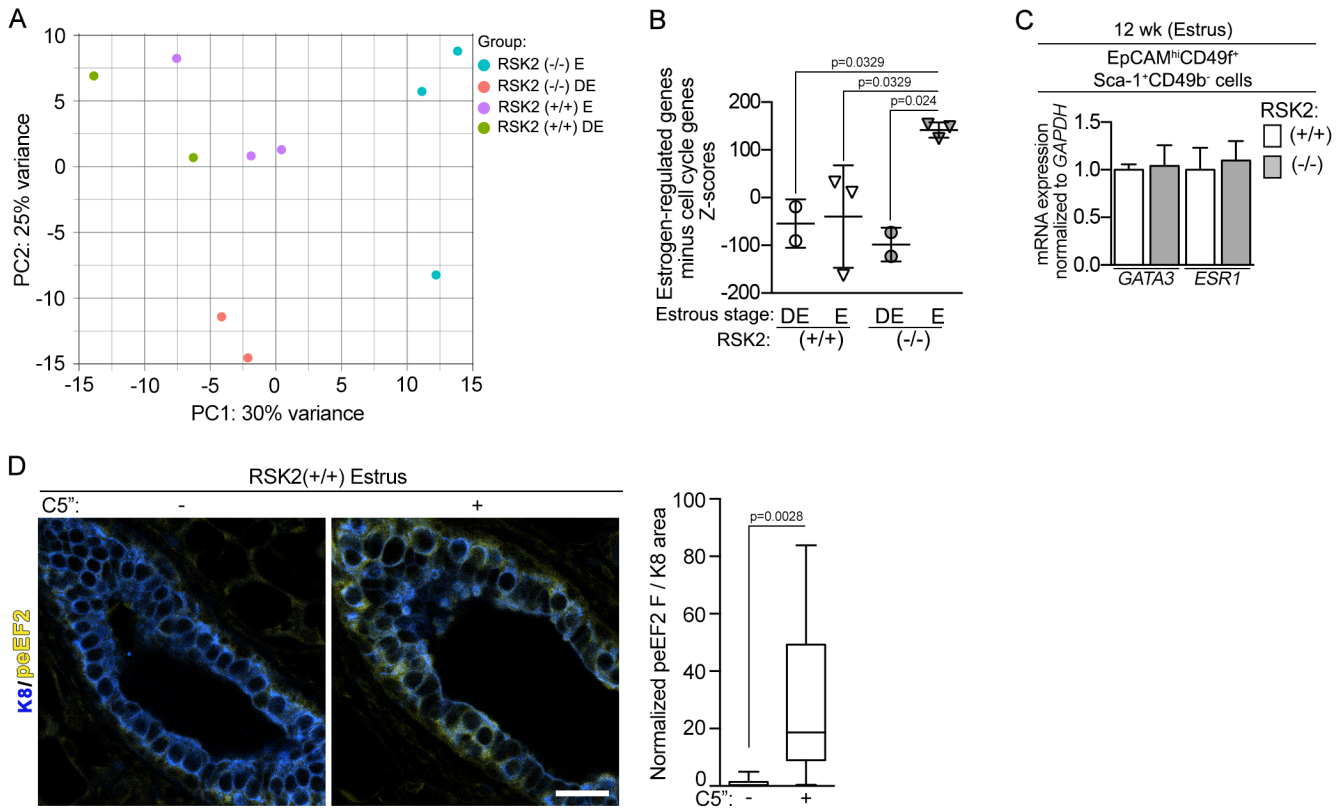

**Figure 4 Transcriptomic analysis of the NCL population.**

(A) Principal component (PC) analysis of the transcriptomic data.

(B) Proliferation genes do not drive the enrichment for estrogen -regulated signature in RSK2 KO estrus mice. Cumulative Z-scores were generated for each mouse by summing individual Z-scores of genes up regulated in estrogen-regulated signature in which the cell cycle genes were removed and subtracting individual Z-scores of genes down regulated. (median  $\pm$  quartile, one-way ANOVA with Holm-Sidak's correction for multiple comparisons) (Table S1).

(C) ESR1 and GATA3 mRNA levels are similar in NCL cells isolated from RSK2-KO and WT mice during the estrus stage (mean  $\pm$  S.D., n=3 mice/genotype in triplicate, Student's t-test).

(D) On target increase in peEF2 *in vivo* by C5'-*n*-propyl cyclitol SL0101 (C5'). Adult mice staged at estrus were treated with vehicle or C5' (40 mg/kg) IP twice every 7 h before euthanasia and isolation of the mammary gland (median  $\pm$  quartile, n  $\geq$  2 mice/genotype in triplicate, Student's t-test).

Related to Figure 4

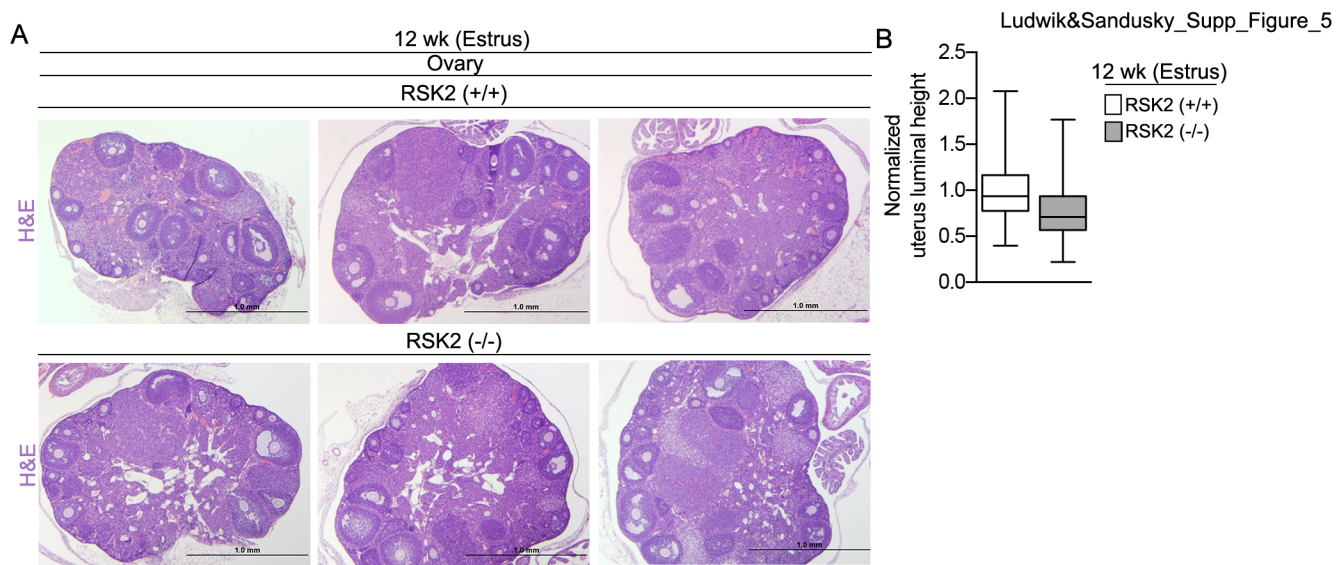

**Figure 5 The hypothalamic-pituitary-ovarian axis is not impaired in RSK2-KO mice.**

(A) Representative H&E images of ovaries. Scale bar = 1 mm.

(B) Luminal height in the uterus in the WT and RSK2-KO are similar. Measurements from  $\geq 30$  randomly selected regions from each animal (median  $\pm$  quartile,  $n \geq 3$  mice/genotype,  $\geq 3$  fields/mouse, Student's t-test).

Related to Figure 5



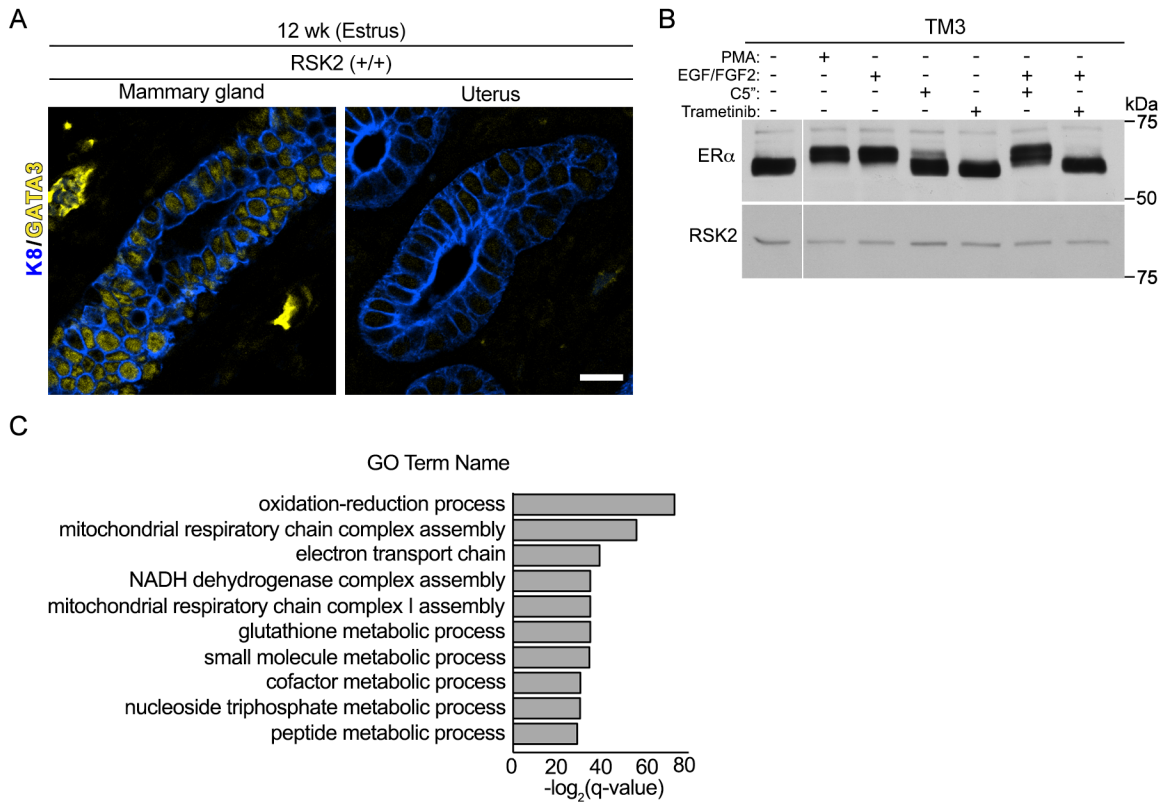

### Figure 6 Phosphorylation of Ser-118 ER $\alpha$ correlates with degradation of ER $\alpha$ .

(A) GATA3 is expressed at very low levels in the uterus compared to the mammary gland. Scale bar = 20  $\mu\text{m}$ . (B) Ser118- ER $\alpha$  phosphorylation occurs in response to agents that stimulate ER $\alpha$  degradation. Serum starved TM3 were treated with PMA (0.5  $\mu\text{M}$ , 20 min) or an EGF/FGF7 cocktail (12.5 nM each, 5 min) with or without C5' (20  $\mu\text{M}$ , 2h) or trametinib (1  $\mu\text{M}$ , 1 h as a pretreatment). The white vertical line indicates that conditions not relevant to the manuscript were removed. (C) GO enrichment analysis for NCL population in RSK2-KO glands at estrus.

Related to Figure 6

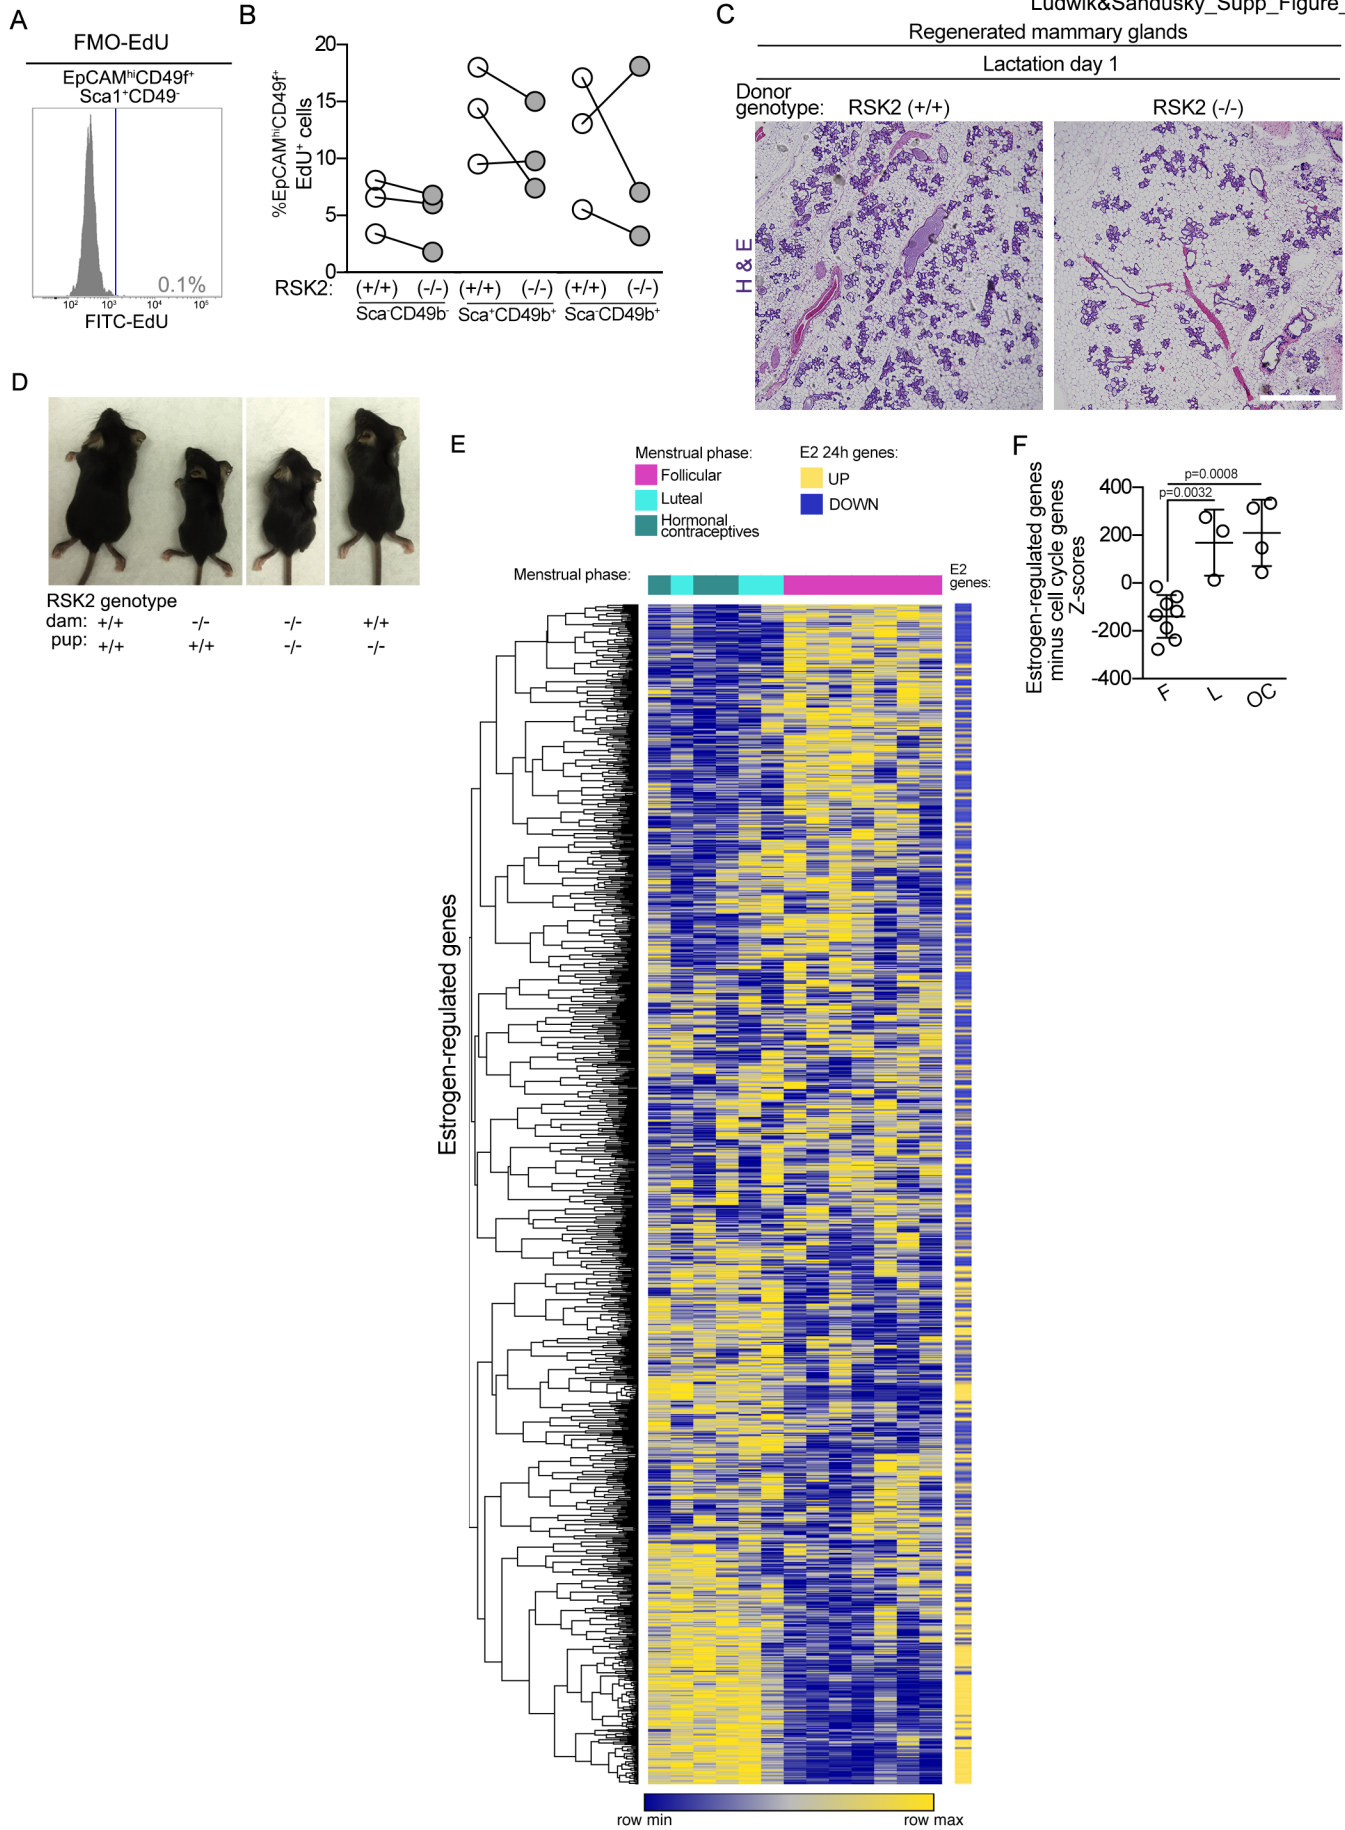

**Figure 7 RSK2-KO dams fail to provide adequate nutrition for their pups.**

(A) Fluorescence minus one strategy for determining the gate for FITC-EdU.

(B) FACS analysis of proliferation of mammary glands using RSK2-KO or WT MECs regenerated in a WT mouse. (n=3 glands/genotype; paired Student's t-test).

(C) Alveolar expansion is reduced in mammary glands regenerated from RSK2-KO mammary epithelial cells as shown by the H&E stains of mammary glands isolated from the same WT dam 1 d after birth. Scale bar = 1 mm.

(D) Representative images of WT and RSK2-KO pups at 21 d nursed by either WT or RSK2-KO dams.

(E) Heat map illustrating that estrogen-regulated signature is enriched in the luteal phase and by oral contraceptive use.

(F) Proliferation genes do not drive the enrichment for the estrogen-regulated signature in individuals in the luteal phase or those taking oral contraceptives. Cumulative Z-scores were generated for each individual by summing individual Z-scores of genes up regulated in estrogen-regulated signature and subtracting individual Z-scores of genes down regulated. (mean  $\pm$  S.D., one-way ANOVA with Holm-Sidak's correction for multiple comparisons) (Table S1).

Related to Figure 7

**Supplemental Table 3. Statistical analysis of gene set overlaps from the NCL populations.**  
 Related to Figure 4

| Gene sets in overlap            |                  | Fisher's exact test for overlap |
|---------------------------------|------------------|---------------------------------|
| Genes UP in R2KO-E vs R2KO-DE   | E2_24h_UP        | 0.00001                         |
| Genes DOWN in R2KO-E vs R2KO-DE | E2_24h_DOWN      | 0.00001                         |
| Genes UP in R2KO-E vs R2KO-DE   | Cell cycle genes | 0.0007                          |
| Genes UP in WT-E vs WT-DE       | E2_24h_UP        | no overlap                      |
| Genes DOWN in WT-E vs WT-DE     | E2_24h_DOWN      | no overlap                      |
| Genes UP in WT-E vs WT-DE       | Cell cycle genes | 0.5785                          |
